# Supplementary material
Source: PubMed Central journal article supplement (PMC2702165)

Supplemental Figure 1A

# Categories

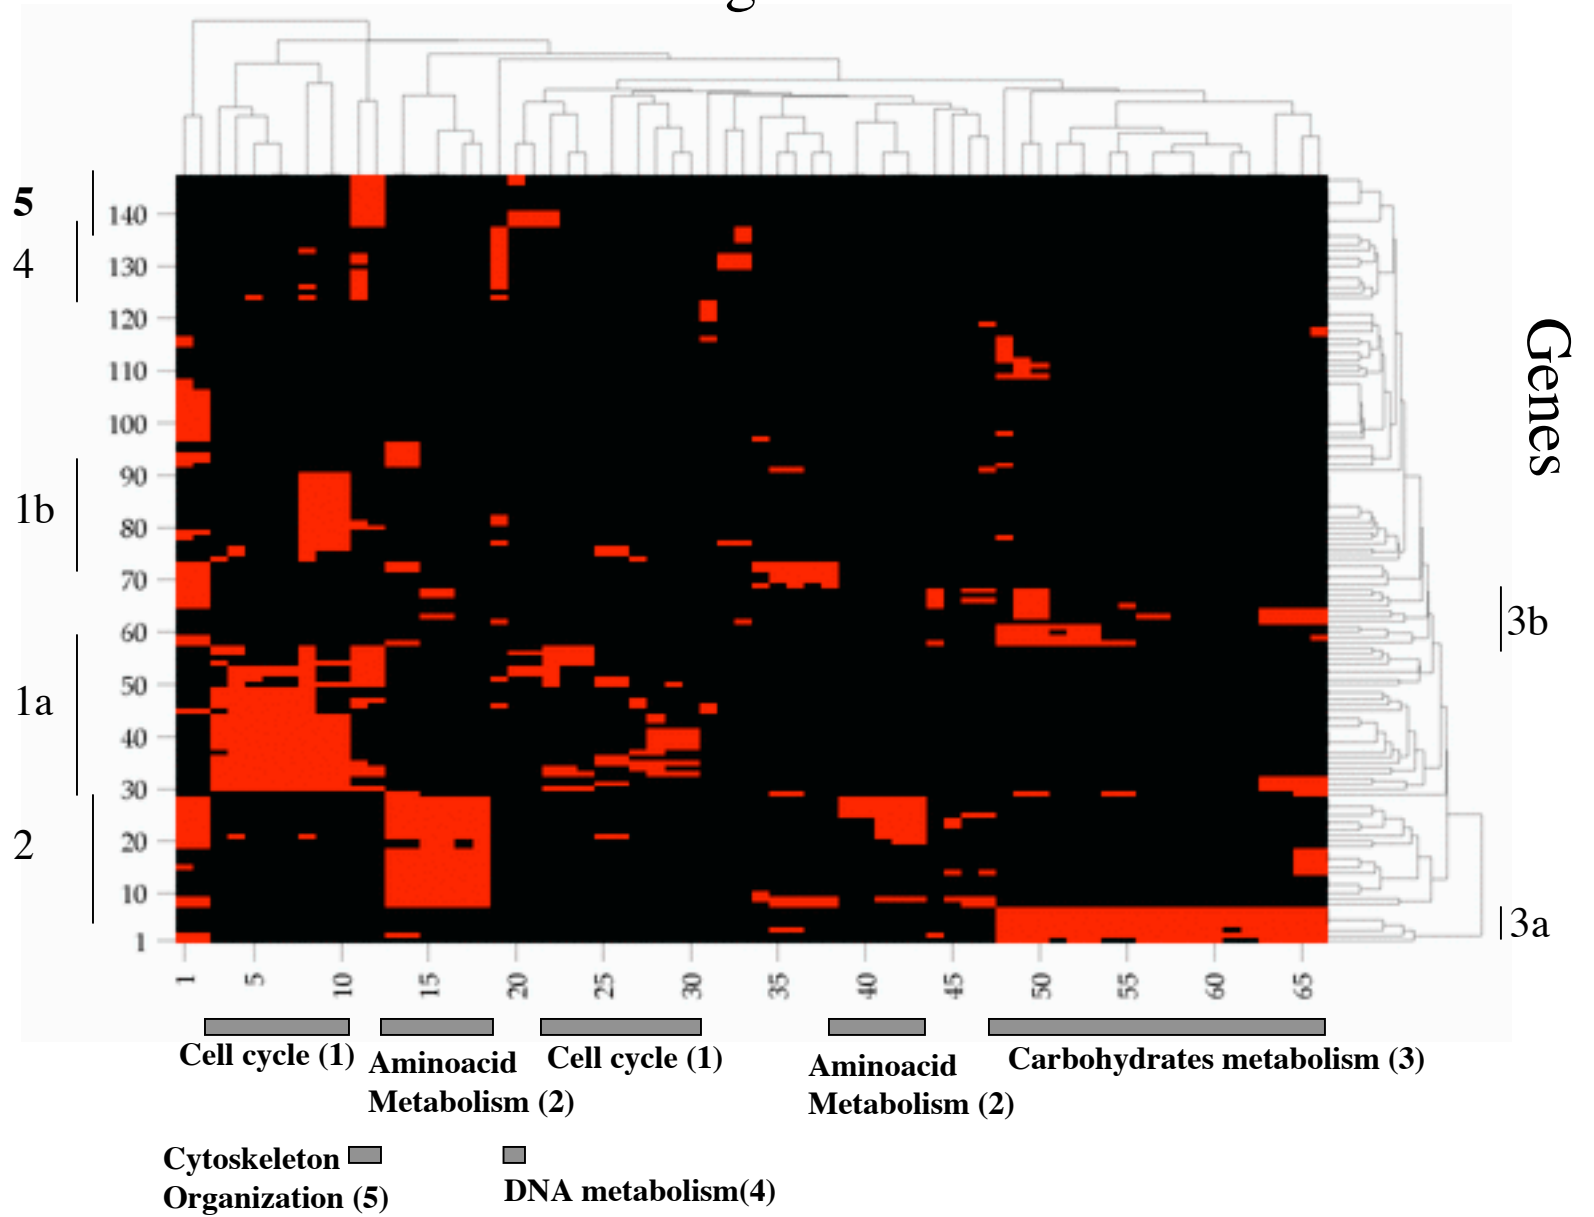

## Supplemental Figure 1B

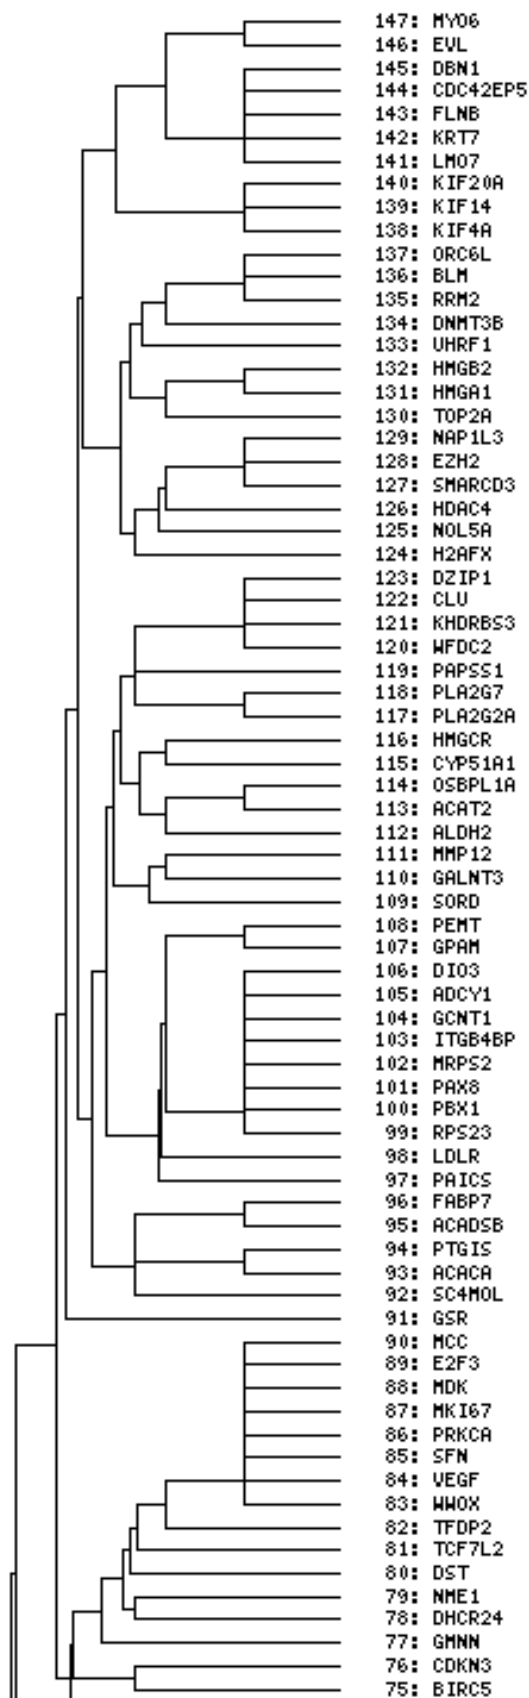

## Supplemental Figure 1B continued

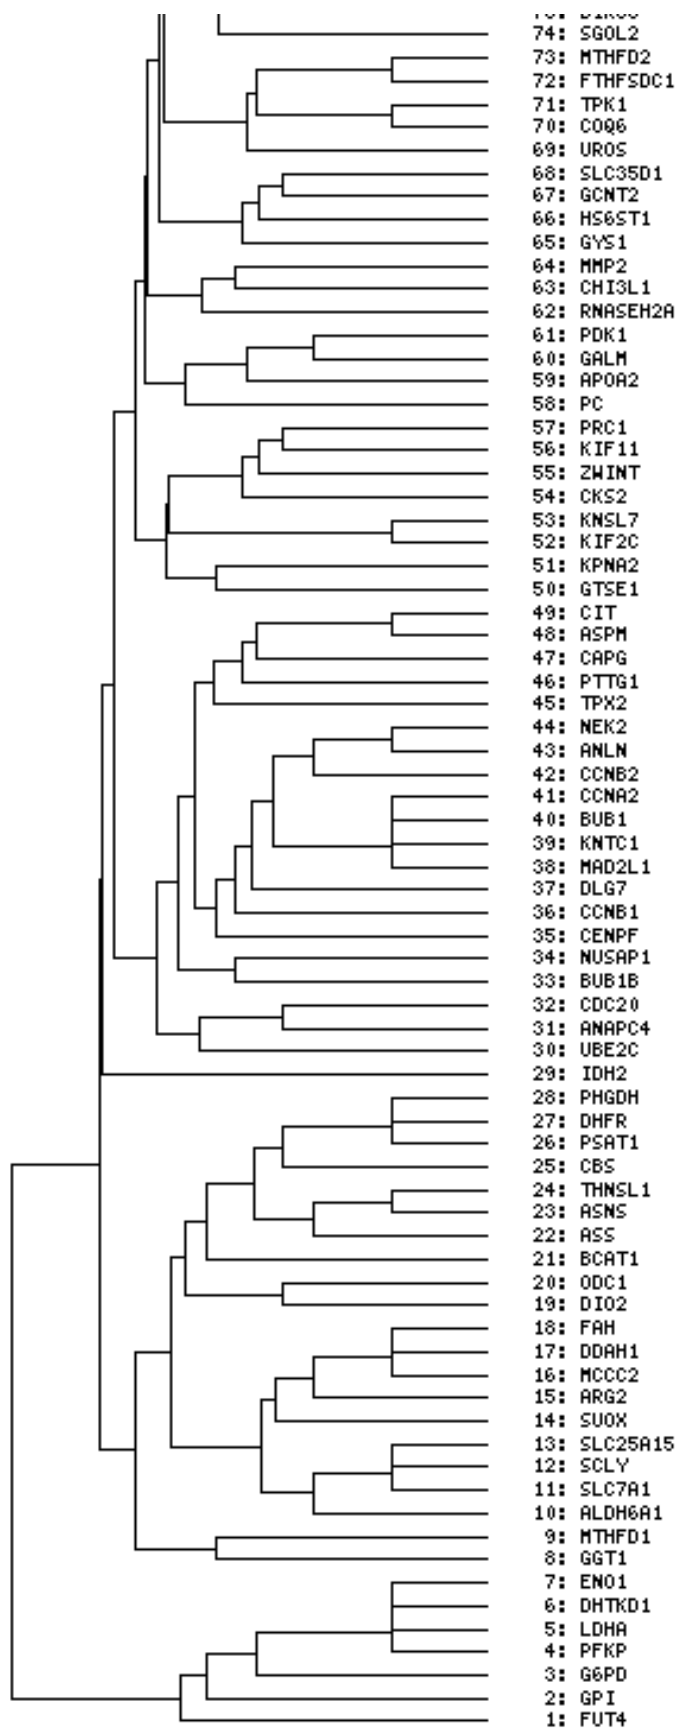

## Supplemental Figure 1C

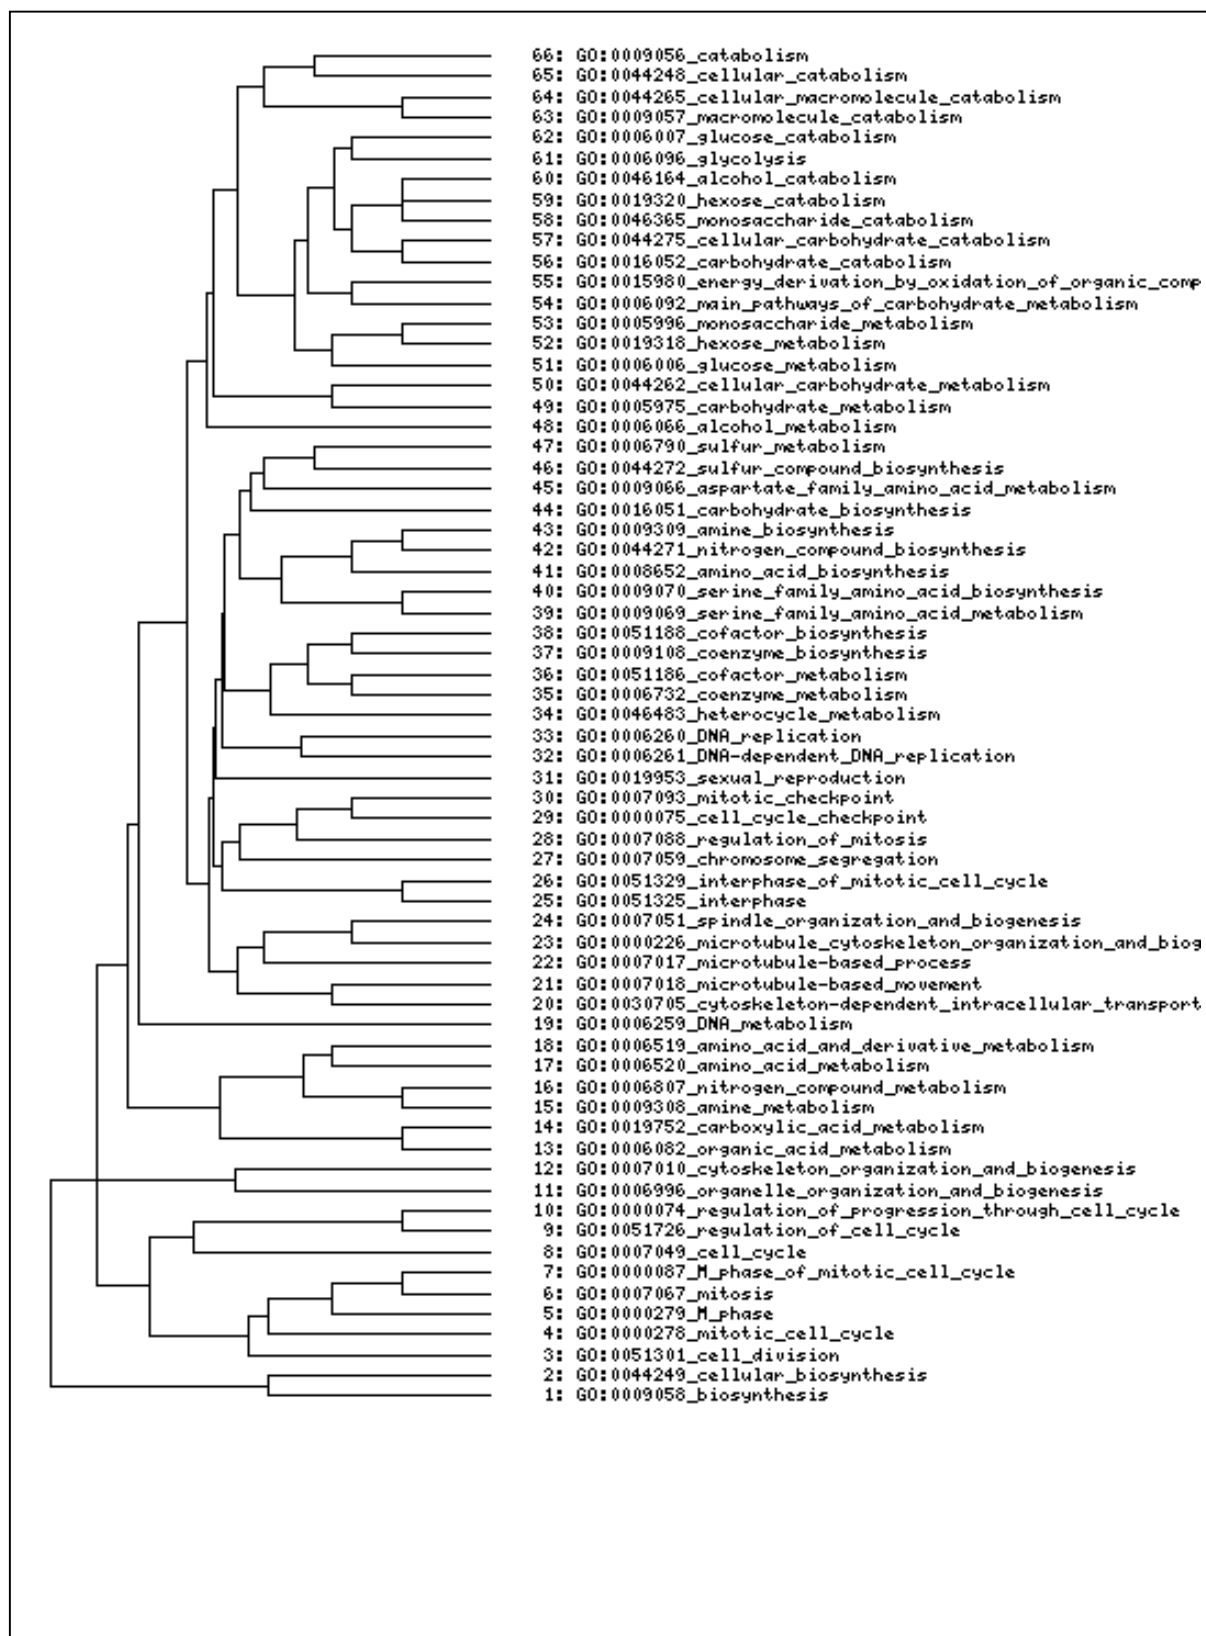

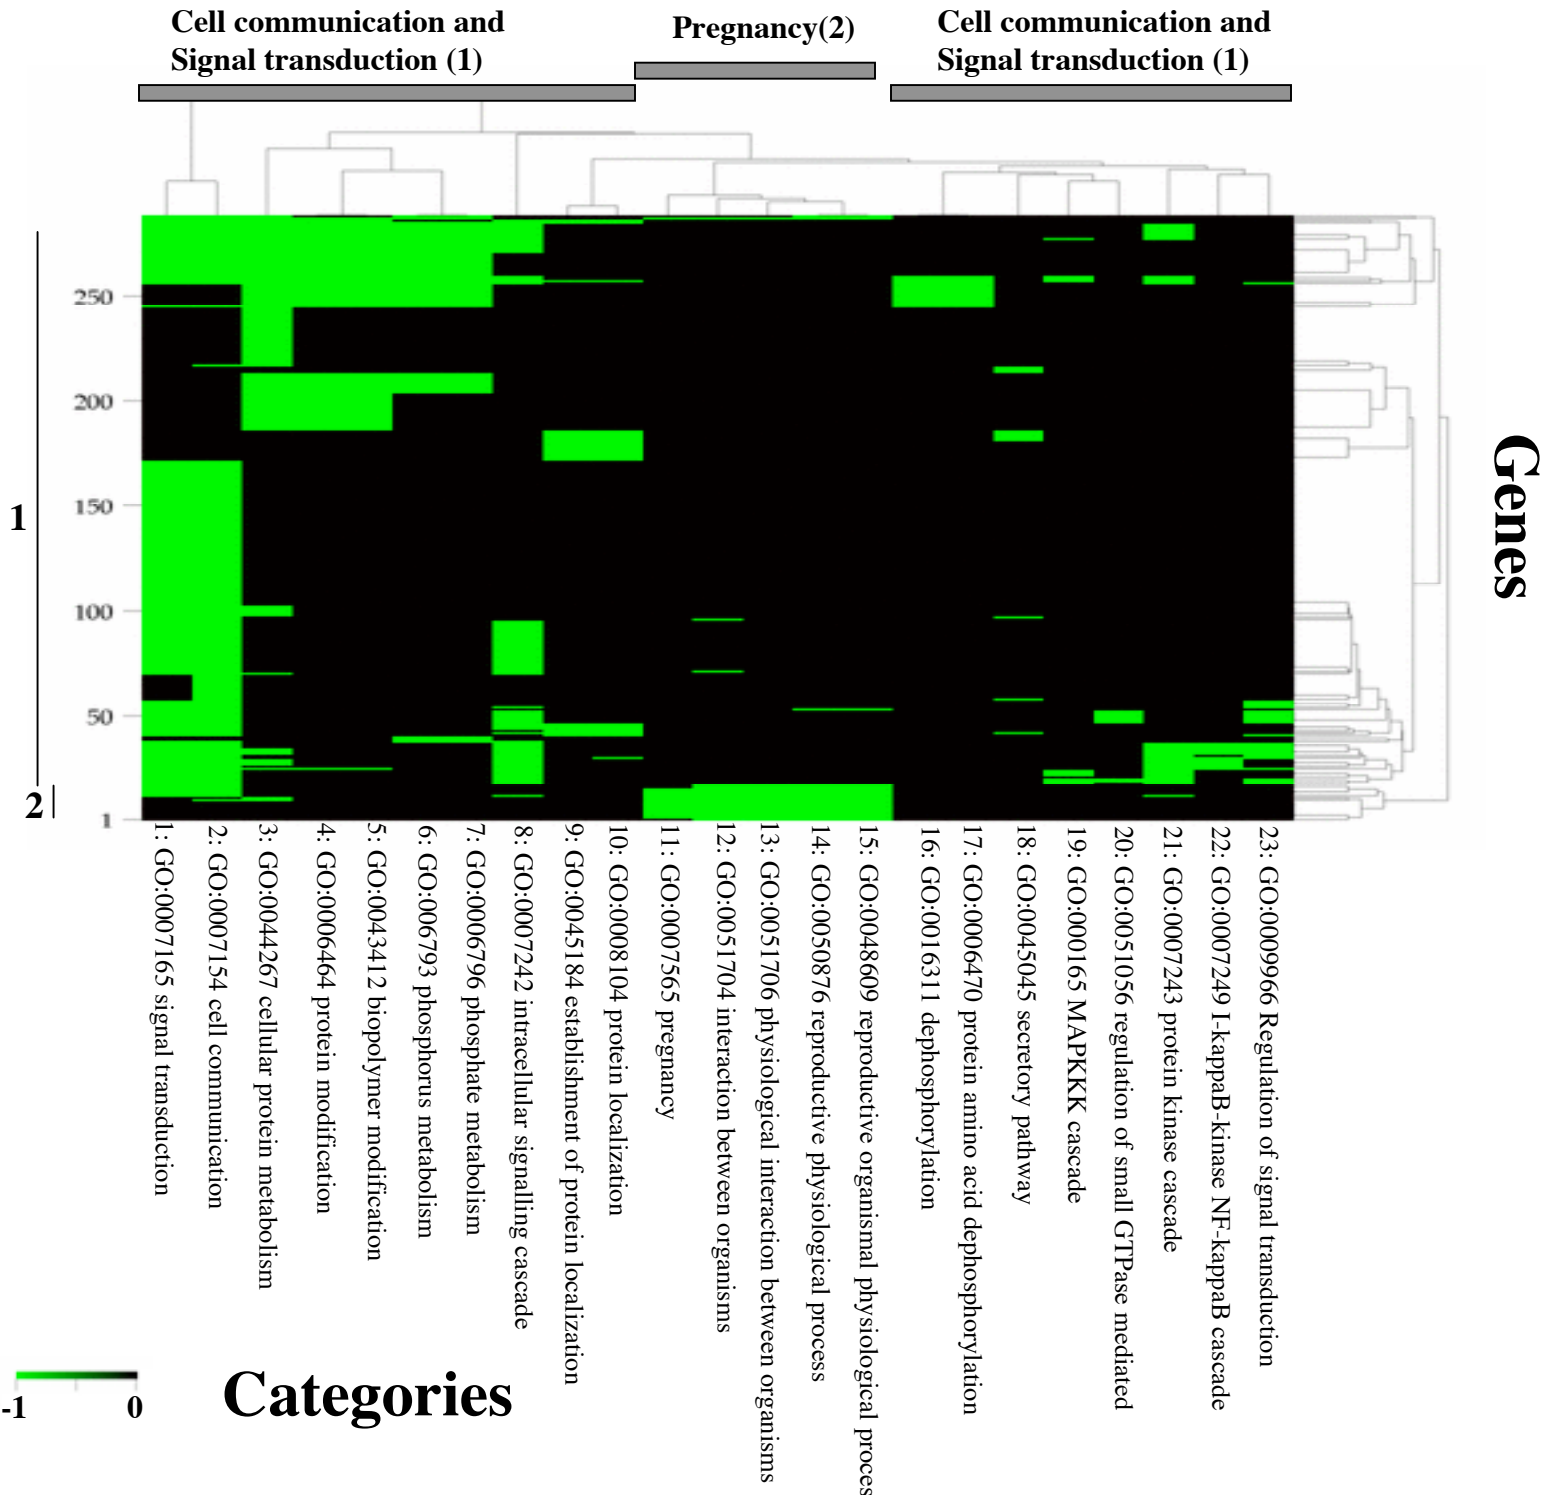

Supplemental Figure 2B

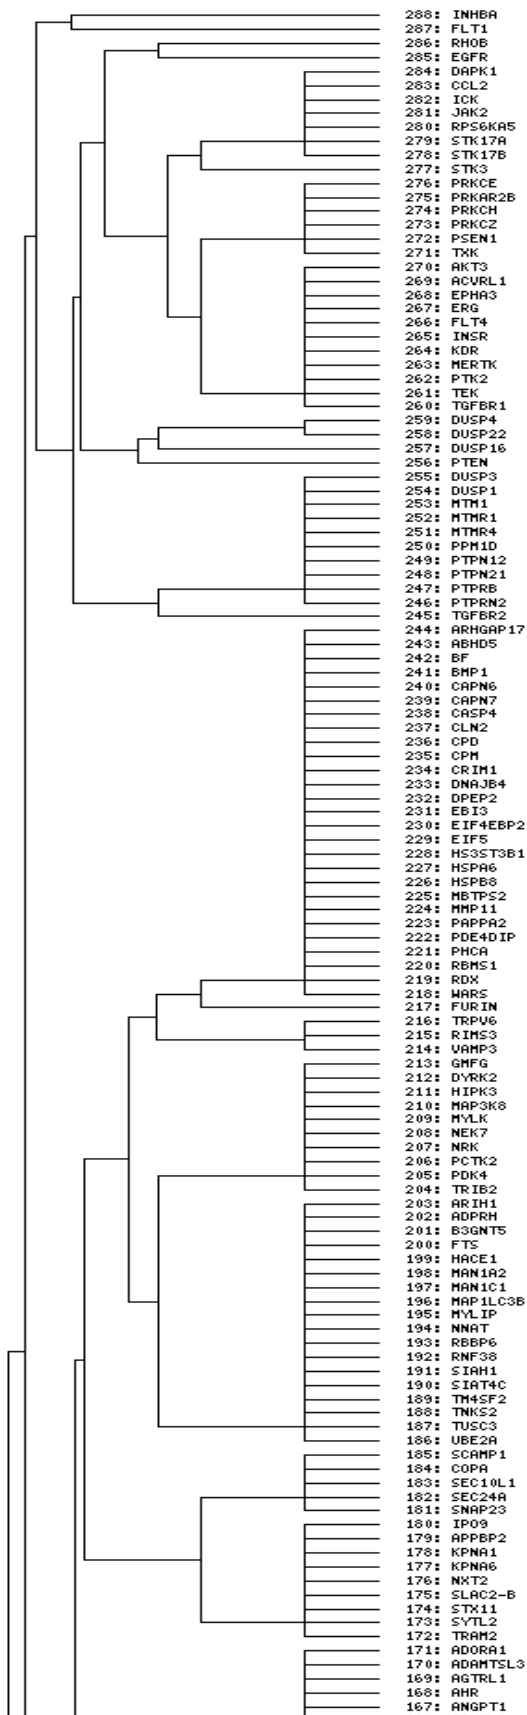

Supplemental Figure 2B continued

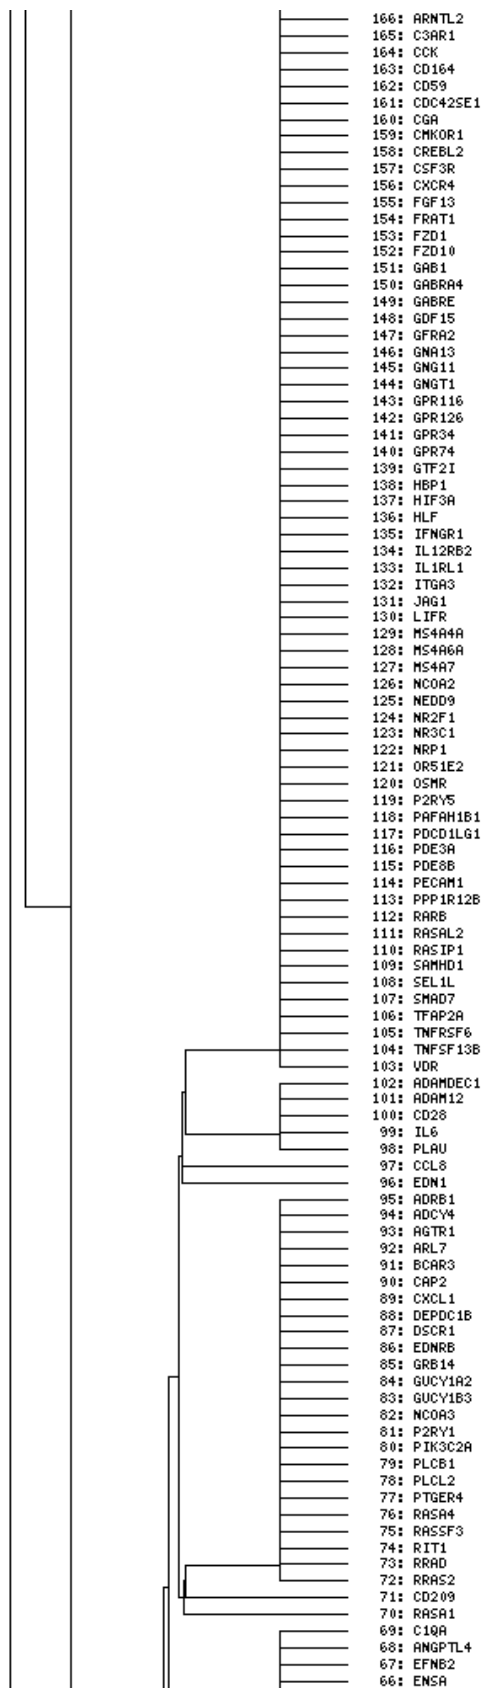

Supplemental Figure 2B continued

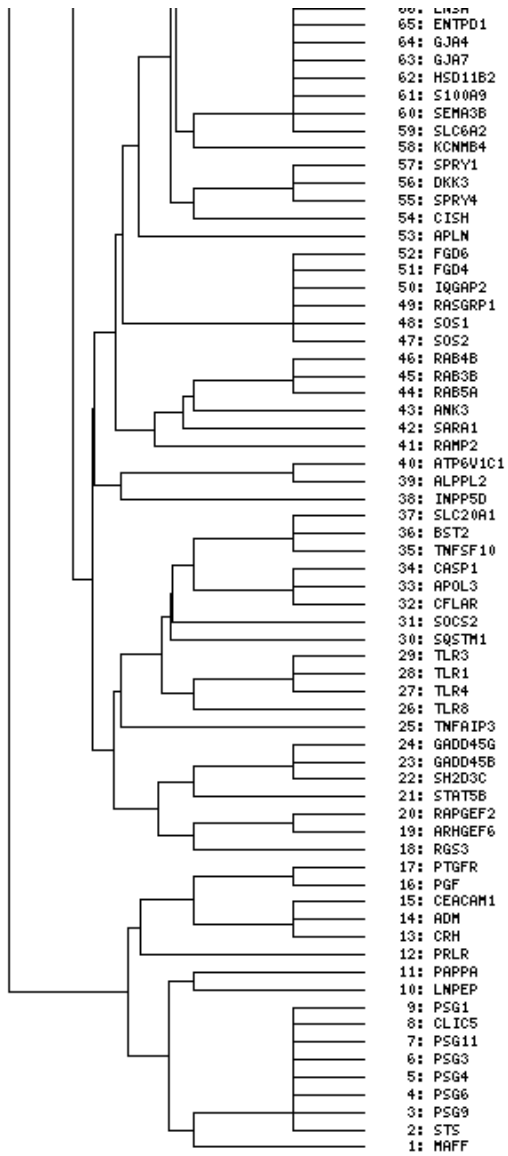



Supplemental Figure 3

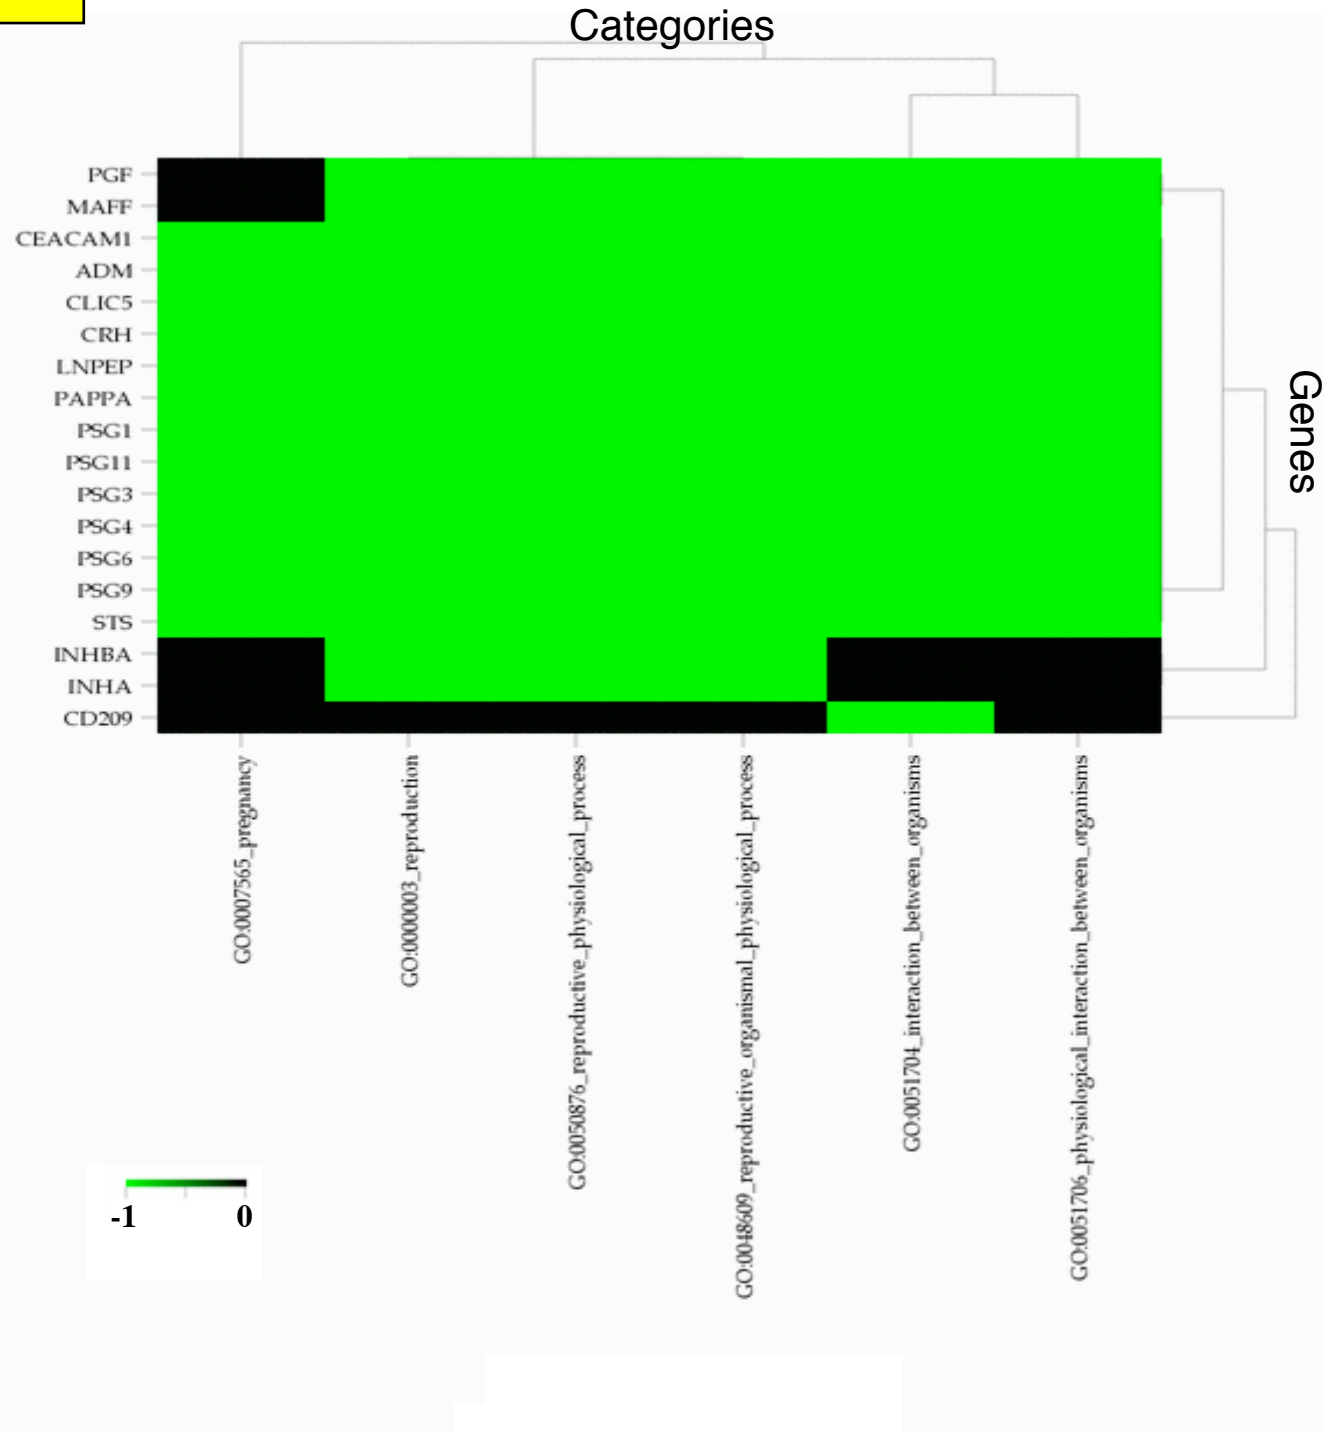

Supplement: NIHMS101231-supplement-Suppl_1.pdf [file NIHMS101231-supplement-Suppl_1.pdf]
